# Supplementary material for: External validation of the modified sepsis renal angina index for prediction of severe acute kidney injury in children with septic shock
Source: Springer Nature journal article supplement (doi:10.1186/s13054-023-04746-6), 2023-11-28
Supplement: MOESM1 [file 26369038]

**Supplemental Methods:**

***Septic Shock Criteria for Original Study:***

(1) At least 2 systemic inflammatory response syndrome (SIRS) criteria (see below) secondary to proven or suspected infection,

PLUS

- Temperature >38 or <36 degrees Celsius
- Heart rate >90<sup>th</sup> percentile for age
- Respiratory rate >90<sup>th</sup> percentile for age, or hyperventilation to PaCO<sub>2</sub> <32 Torr
- White blood cell count >12,000 or <4,000

(2) Cultures either pending or positive, PLUS

(3) Two distinct measurements of hypotension (mean arterial pressure or systolic blood pressure <3<sup>rd</sup> percentile for age) after 20

ml/kg of crystalloid or colloid, PLUS

(4) At least one of the following:

- Requirement of vasoactive support, OR
- GCS <15 (in the absence of CNS disease), OR
- Blood lactic acid level >1.6 mmol/L, OR
- Urine output <1 ml/kg/hr
