# Supplementary material for: External validation of the modified sepsis renal angina index for prediction of severe acute kidney injury in children with septic shock
Source: Springer Nature journal article supplement (doi:10.1186/s13054-023-04746-6), 2023-11-28

**Supplemental Figures:**

**Figure S1: Patient inclusion CONSORT flow diagram.**

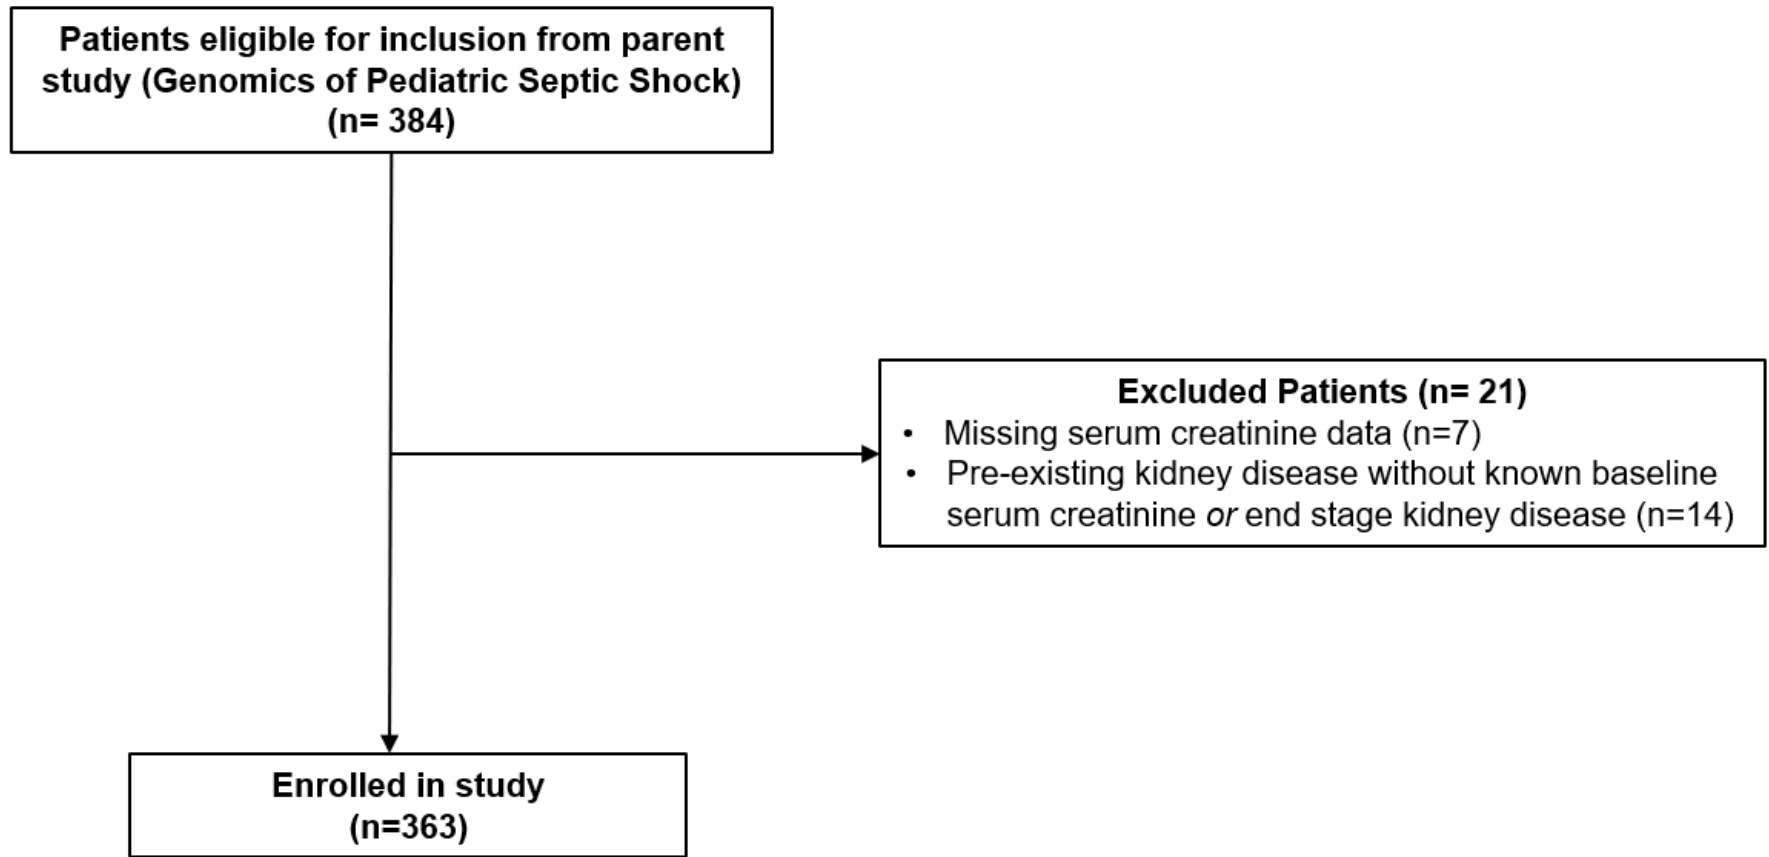

**Figure S2: Flow diagram of Day 1 acute kidney injury risk assessment tools and incidence of Day 3 severe acute kidney injury.** SCr>Baseline: serum creatinine elevated above baseline; RAI: Renal Angina Index; sRAI: modified sepsis Renal Angina Index.

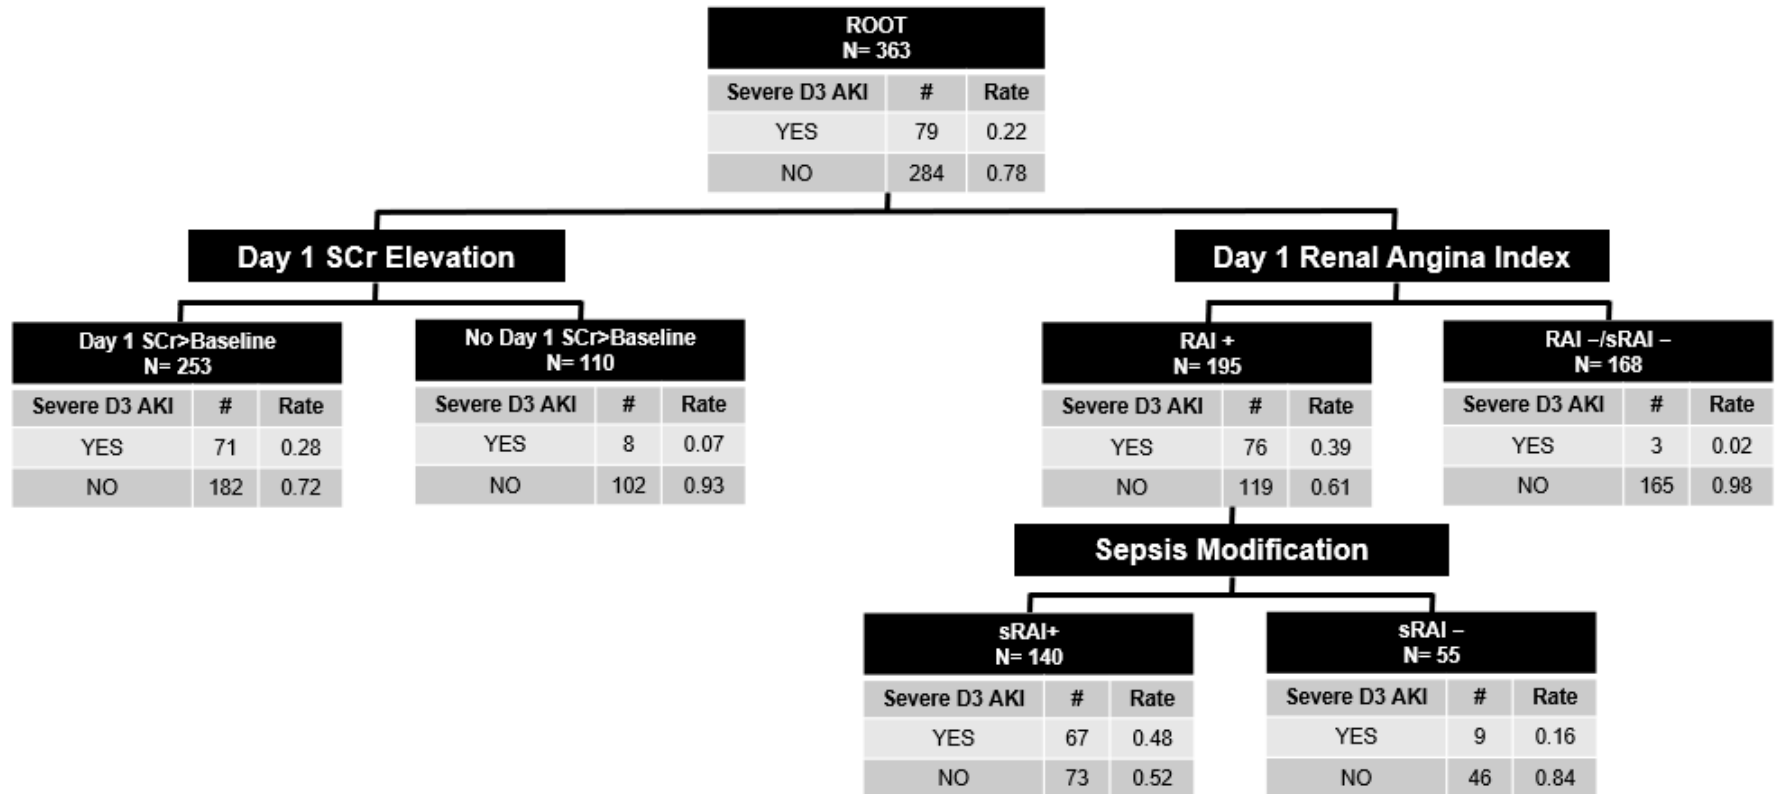

Supplement: MOESM2 [file 26369038]
