# Supplementary material for: External validation of the modified sepsis renal angina index for prediction of severe acute kidney injury in children with septic shock
Source: Springer Nature journal article supplement (doi:10.1186/s13054-023-04746-6), 2023-11-28
Supplement: MOESM3 [file 26369038]

**Supplemental Tables:****Supplemental Table S1. Distribution of outcomes by Renal Angina Index (RAI) Score and modified sepsis RAI (sRAI) designation.**

|                                                            | Total Patients, n<br>(% cohort) | Incidence D3 Severe AKI, n<br>(% in category) | Incidence D1-7 KRT, n<br>(% in category) |
|------------------------------------------------------------|---------------------------------|-----------------------------------------------|------------------------------------------|
| <b>RAI Score</b>                                           |                                 |                                               |                                          |
| 1                                                          | 31 (8.5)                        | 0 (0)                                         | 0 (0)                                    |
| 2                                                          | 72 (20)                         | 0 (0)                                         | 0 (0)                                    |
| 3                                                          | 2 (0.5)                         | 0 (0)                                         | 0 (0)                                    |
| 4                                                          | 33 (9)                          | 2 (6)                                         | 2 (6)                                    |
| 5                                                          | 27 (7.5)                        | 1 (4)                                         | 1 (4)                                    |
| 6                                                          | 3 (0.5)                         | 0 (0)                                         | 0 (0)                                    |
| 8                                                          | 39 (11)                         | 13 (33)                                       | 4 (10)                                   |
| 10                                                         | 52 (14)                         | 5 (10)                                        | 4 (8)                                    |
| 12                                                         | 4 (1)                           | 1 (25)                                        | 0 (0)                                    |
| 20                                                         | 17 (5)                          | 2 (12)                                        | 1 (6)                                    |
| 24                                                         | 10 (3)                          | 6 (60)                                        | 5 (50)                                   |
| 40                                                         | 73 (20)                         | 49 (67)                                       | 32 (44)                                  |
| <b>sRAI Designation</b>                                    |                                 |                                               |                                          |
| <b>Negative</b>                                            |                                 |                                               |                                          |
| A.RAI <8                                                   | 168 (46)                        | 3 (2)                                         | 3 (2)                                    |
| B.RAI 8 to < 20 and platelets<br>≥ 150x10 <sup>3</sup> /μL | 55 (15)                         | 9 (16)                                        | 1 (2)                                    |
| <b>Positive</b>                                            |                                 |                                               |                                          |
| A.RAI Score ≥ 20                                           | 100 (28)                        | 57 (57)                                       | 38 (38)                                  |
| B.RAI 8 to < 20 and platelets<br>< 150x10 <sup>3</sup> /μL | 40 (11)                         | 10 (25)                                       | 7 (18)                                   |

Data for categorical variables are reported as n (%)

**Supplemental Table S2. Distribution of Outcomes by Renal Angina Index (RAI) and modified sepsis RAI (sRAI) components.**

| <b>RAI/sRAI Components</b>                        | <b>Total Patients, n (% cohort)</b> | <b>Incidence D3 Severe AKI, n (% in category)</b> | <b>Incidence D1-7 KRT, n (% in category)</b> |
|---------------------------------------------------|-------------------------------------|---------------------------------------------------|----------------------------------------------|
| <b>History of Transplantation</b>                 |                                     |                                                   |                                              |
| Yes                                               | 34 (9)                              | 18 (53)                                           | 13 (38)                                      |
| No                                                | 329 (91)                            | 61 (19)                                           | 36 (11)                                      |
| <b>D1 Vasoactive Use</b>                          |                                     |                                                   |                                              |
| Yes                                               | 268 (74)                            | 70 (26)                                           | 45 (17)                                      |
| No                                                | 95 (26)                             | 9 (9)                                             | 4 (4)                                        |
| <b>D1 Mechanical Ventilation</b>                  |                                     |                                                   |                                              |
| Yes                                               | 202 (56)                            | 60 (30)                                           | 39 (19)                                      |
| No                                                | 161 (44)                            | 19 (12)                                           | 10 (6)                                       |
| <b>D1% Fluid Balance</b>                          |                                     |                                                   |                                              |
| <5%                                               | 213 (59)                            | 41 (19)                                           | 26 (12)                                      |
| 5-10%                                             | 103 (28)                            | 21 (20)                                           | 14 (14)                                      |
| 10-15%                                            | 28 (8)                              | 11 (39)                                           | 4 (14)                                       |
| >15%                                              | 14 (4)                              | 6 (43)                                            | 5 (36)                                       |
| <b>D1 SCr&gt;Baseline</b>                         |                                     |                                                   |                                              |
| Decreased or no change                            | 106 (29)                            | 5 (5)                                             | 4 (4)                                        |
| >1-1.49x,                                         | 104 (29)                            | 5 (5)                                             | 5 (5)                                        |
| 1.5-1.99x                                         | 42 (12)                             | 5 (12)                                            | 2 (5)                                        |
| ≥2x                                               | 84 (23)                             | 39 (46)                                           | 12 (14)                                      |
| On KRT                                            | 26 (7)                              | 25 (96)                                           | 26 (100)                                     |
| <b>Platelet Count &lt;150 x 10<sup>3</sup>/uL</b> |                                     |                                                   |                                              |
| Yes                                               | 171 (47)                            | 51 (30)                                           | 36 (21)                                      |
| No                                                | 192 (53)                            | 28 (15)                                           | 13 (7)                                       |

Data for categorical variables are reported as n (%)
